# Supplementary material for: Evaluation of the Role of Veterinarians for Outcomes Related to the Health and Production of Dairy Small Ruminants in Greece
Source: MDPI journal article supplement (doi:10.3390/ani13213371), 2023-10-30
Supplement: s1 [file s1]

# Evaluation of the Role of Veterinarians for Outcomes Related to the Health and Production of Dairy Small Ruminants in Greece

Daphne T. Lianou and George C. Fthenakis

**Table S1.** Details of multivariable models employed for the evaluation of professional relationship with production- or health-related outcomes in 325 sheep flocks and 119 goat herds in Greece.

| Outcome                                       | Variables offered to the multivariable models ( <i>n</i> ) | Variables required in the final models                                                                                                                                                                                                                                                                 |
|-----------------------------------------------|------------------------------------------------------------|--------------------------------------------------------------------------------------------------------------------------------------------------------------------------------------------------------------------------------------------------------------------------------------------------------|
| Professional relationship with a veterinarian | 10                                                         | (a) Average annual milk production per ewe / doe, (b) Average number of lambs / kids born per ewe / doe, (c) Incidence of clinical mastitis, (d) Epg counts in faecal samples, (e) Body condition score, (f) Somatic cell counts in bulk-tank milk, (g) Isolation of staphylococci from bulk-tank milk |
| Average milk production per ewe / doe         | 3                                                          | (a) Age of the veterinarian                                                                                                                                                                                                                                                                            |
| Somatic cell counts in bulk-tank milk         | 3                                                          | (a) Gender of the veterinarian, (b) Age of the veterinarian                                                                                                                                                                                                                                            |
| Incidence of clinical mastitis                | 3                                                          | (a) Age of the veterinarian                                                                                                                                                                                                                                                                            |
| Incidence of clinical mastitis                | 3                                                          | (a) Gender of the veterinarian, (b) Age of the veterinarian                                                                                                                                                                                                                                            |

**Table S2.** Results of univariable analysis of parameters ( $n = 106$ ) evaluated for association, in 325 sheep flocks and 119 goat herds in Greece, with the outcome ‘professional relationship with a veterinarian’.

| Farms in which there was a professional relationship with a veterinarian ( <i>n</i> = 384) |                |                |           | Farms in which there was no professional relationship with a veterinarian ( <i>n</i> = 60) |                |                |           |          |
|--------------------------------------------------------------------------------------------|----------------|----------------|-----------|--------------------------------------------------------------------------------------------|----------------|----------------|-----------|----------|
| General Management Applied in the Farm                                                     |                |                |           |                                                                                            |                |                |           |          |
| Management system applied in farms                                                         |                |                |           |                                                                                            |                |                |           |          |
| Intensive                                                                                  | Semi-intensive | Semi-extensive | Extensive | Intensive                                                                                  | Semi-intensive | Semi-extensive | Extensive | <i>p</i> |
| 48                                                                                         | 155            | 157            | 24        | 5                                                                                          | 14             | 20             | 21        | < 0.0001 |
| Seasonal transfer of animals to other site                                                 |                |                |           |                                                                                            |                |                |           |          |
| Yes                                                                                        |                | No             |           | Yes                                                                                        |                | No             |           | <i>p</i> |
| 61                                                                                         |                | 323            |           | 17                                                                                         |                | 43             |           | 0.018    |
| Infrastructure                                                                             |                |                |           |                                                                                            |                |                |           |          |
| Availability of milking parlour                                                            |                |                |           |                                                                                            |                |                |           |          |
| Yes                                                                                        |                | No             |           | Yes                                                                                        |                | No             |           | <i>p</i> |
| 292                                                                                        |                | 92             |           | 29                                                                                         |                | 31             |           | < 0.0001 |
| Availability of isolation facilities for animals                                           |                |                |           |                                                                                            |                |                |           |          |
| Yes                                                                                        |                | No             |           | Yes                                                                                        |                | No             |           | <i>p</i> |
| 296                                                                                        |                | 88             |           | 33                                                                                         |                | 27             |           | 0.0003   |
| Availability of milk replacer facilities and equipment for administration of milk replacer |                |                |           |                                                                                            |                |                |           |          |
| Yes                                                                                        |                | No             |           | Yes                                                                                        |                | No             |           | <i>p</i> |
| 20                                                                                         |                | 364            |           | 3                                                                                          |                | 57             |           | 0.95     |
| Animals                                                                                    |                |                |           |                                                                                            |                |                |           |          |
| No. of female animals in the farm                                                          |                |                |           |                                                                                            |                |                |           |          |
| 240 (100) ewes / does                                                                      |                |                |           | 250 (199) ewes / does                                                                      |                |                |           | 0.41     |
| Average age of culling females                                                             |                |                |           |                                                                                            |                |                |           |          |
| ≤ 6 years                                                                                  |                | > 6 years      |           | ≤ 6 years                                                                                  |                | > 6 years      |           | <i>p</i> |
| 239                                                                                        |                | 145            |           | 30                                                                                         |                | 30             |           | 0.007    |

| Health Management                                                           |                     |                      |                  |                |                  |                      |                 |                        |          |                               |
|-----------------------------------------------------------------------------|---------------------|----------------------|------------------|----------------|------------------|----------------------|-----------------|------------------------|----------|-------------------------------|
| Use of laboratory diagnostic examinations in samples of milk preventively   |                     |                      |                  |                |                  |                      |                 |                        |          |                               |
| Yes                                                                         | No                  |                      |                  | Yes            |                  |                      | No              |                        | <i>p</i> |                               |
| 91                                                                          | 293                 |                      |                  | 4              |                  |                      | 56              |                        | 0.0003   |                               |
| Use of laboratory diagnostic examinations in samples of blood preventively  |                     |                      |                  |                |                  |                      |                 |                        |          |                               |
| Yes                                                                         | No                  |                      |                  | Yes            |                  |                      | No              |                        | <i>p</i> |                               |
| 122                                                                         | 262                 |                      |                  | 16             |                  |                      | 44              |                        | 0.43     |                               |
| Use of laboratory diagnostic examinations in samples of faeces preventively |                     |                      |                  |                |                  |                      |                 |                        |          |                               |
| Yes                                                                         | No                  |                      |                  | Yes            |                  |                      | No              |                        | <i>p</i> |                               |
| 51                                                                          | 333                 |                      |                  | 0              |                  |                      | 60              |                        | 0.003    |                               |
| Number of occasions of administration of anthelmintic drugs annually        |                     |                      |                  |                |                  |                      |                 |                        |          |                               |
| 2 (1)                                                                       |                     |                      |                  | 1.5 (1)        |                  |                      |                 | 0.009                  |          |                               |
| Families of anthelmintics administered                                      |                     |                      |                  |                |                  |                      |                 |                        |          |                               |
| Benzimidazoles                                                              | Imidazothiazoles    | Macrocyclic lactones | Salicylanilides  | Benzimidazoles | Imidazothiazoles | Macrocyclic lactones | Salicylanilides | <i>p</i>               |          |                               |
| 287                                                                         | 9                   | 281                  | 31               | 51             | 1                | 37                   | 4               | 0.08, 0.53, 0.07, 0.62 |          |                               |
| Pharmaceutical form of anthelmintics administered                           |                     |                      |                  |                |                  |                      |                 |                        |          |                               |
| Tablet                                                                      | Injectable solution | Oral drench          | Pour-on solution | Premix         | Tablet           | Injectable solution  | Oral drench     | Pour-on solution       | Premix   | <i>p</i>                      |
| 269                                                                         | 233                 | 171                  | 19               | 2              | 45               | 23                   | 26              | 0                      | 0        | 0.43, 0.001, 0.86, 0.08, 0.54 |
| Administration of ectoparasiticides                                         |                     |                      |                  |                |                  |                      |                 |                        |          |                               |
| Yes                                                                         | No                  |                      |                  | Yes            |                  |                      | No              |                        | <i>p</i> |                               |
| 152                                                                         | 232                 |                      |                  | 27             |                  |                      | 33              |                        | 0.43     |                               |
| Vaccination against <i>Chlamydia</i> infection                              |                     |                      |                  |                |                  |                      |                 |                        |          |                               |
| Yes                                                                         | No                  |                      |                  | Yes            |                  |                      | No              |                        | <i>p</i> |                               |
| 153                                                                         | 231                 |                      |                  | 16             |                  |                      | 44              |                        | 0.05     |                               |

|                                                                          |     |       |    |          |
|--------------------------------------------------------------------------|-----|-------|----|----------|
| Vaccination against clostridial infections                               |     |       |    |          |
| Yes                                                                      | No  | Yes   | No | <i>p</i> |
| 377                                                                      | 7   | 57    | 3  | 0.12     |
| Vaccination against contagious agalactia                                 |     |       |    |          |
| Yes                                                                      | No  | Yes   | No | <i>p</i> |
| 235                                                                      | 149 | 16    | 44 | < 0.0001 |
| Vaccination against foot-rot                                             |     |       |    |          |
| Yes                                                                      | No  | Yes   | No | <i>p</i> |
| 4                                                                        | 380 | 1     | 59 | 0.67     |
| Vaccination against contagious ecthyma                                   |     |       |    |          |
| Yes                                                                      | No  | Yes   | No | <i>p</i> |
| 4                                                                        | 380 | 0     | 60 | 0.43     |
| Vaccination against paratuberculosis                                     |     |       |    |          |
| Yes                                                                      | No  | Yes   | No | <i>p</i> |
| 35                                                                       | 349 | 7     | 53 | 0.53     |
| Vaccination against bacterial pneumonia                                  |     |       |    |          |
| Yes                                                                      | No  | Yes   | No | <i>p</i> |
| 162                                                                      | 222 | 21    | 39 | 0.29     |
| Vaccination against staphylococcal mastitis                              |     |       |    |          |
| Yes                                                                      | No  | Yes   | No | <i>p</i> |
| 150                                                                      | 234 | 10    | 50 | 0.0007   |
| Total number of optional vaccines administered annually                  |     |       |    |          |
| 3 (2)                                                                    |     | 2 (2) |    | < 0.0001 |
| Administration of 'dry-ewe' treatment at the end of the lactation period |     |       |    |          |
| Yes                                                                      | No  | Yes   | No | <i>p</i> |
| 63                                                                       | 321 | 5     | 55 | 0.11     |

| Duration of the dry-period                                                             |              |              |              |          |
|----------------------------------------------------------------------------------------|--------------|--------------|--------------|----------|
| 3 (1.5) months                                                                         |              | 3 (2) months |              | 0.46     |
| Record keeping                                                                         |              |              |              |          |
| Yes                                                                                    | No           | Yes          | No           | <i>p</i> |
| 256                                                                                    | 128          | 31           | 29           | 0.024    |
| Pharmaceutical Treatment                                                               |              |              |              |          |
| Routine administration of antimicrobials to newborns                                   |              |              |              |          |
| Yes                                                                                    | No           | Yes          | No           | <i>p</i> |
| 94                                                                                     | 290          | 6            | 54           | 0.013    |
| Maintenance of prescribed withdrawal periods after administration of pharmaceuticals   |              |              |              |          |
| Yes                                                                                    | No           | Yes          | No           | <i>p</i> |
| 378                                                                                    | 6            | 60           | 0            | 0.33     |
| Means of calculating live bodyweight for the administration of pharmaceutical products |              |              |              |          |
| Weighing                                                                               | Estimation   | Weighing     | Estimation   | <i>p</i> |
| 79                                                                                     | 305          | 20           | 40           | 0.027    |
| Routine overdosing                                                                     |              |              |              |          |
| Yes                                                                                    | No           | Yes          | No           | <i>p</i> |
| 71                                                                                     | 313          | 16           | 44           | 0.14     |
| Number of antibiotics used for treatment of clinical mastitis                          |              |              |              |          |
| 2 (0)                                                                                  |              | 2 (0)        |              | 0.88     |
| Route for administration of antibiotics                                                |              |              |              |          |
| Systemic                                                                               | Intramammary | Systemic     | Intramammary | <i>p</i> |
| 271                                                                                    | 32           | 43           | 6            | > 0.50   |
| Administration of flunixin in cases of clinical mastitis                               |              |              |              |          |
| Yes                                                                                    | No           | Yes          | No           | <i>p</i> |
| 38                                                                                     | 346          | 1            | 59           | 0.036    |

| Biosecurity Management                                           |                                                          |                                                         |                                                         |          |
|------------------------------------------------------------------|----------------------------------------------------------|---------------------------------------------------------|---------------------------------------------------------|----------|
| Quarantine of new animals arriving at the farm                   |                                                          |                                                         |                                                         |          |
| Yes                                                              | No                                                       | Yes                                                     | No                                                      | <i>p</i> |
| 245                                                              | 139                                                      | 27                                                      | 33                                                      | 0.005    |
| Isolation of sick animals at the farm                            |                                                          |                                                         |                                                         |          |
| Yes                                                              | No                                                       | Yes                                                     | No                                                      | <i>p</i> |
| 328                                                              | 56                                                       | 46                                                      | 14                                                      | 0.08     |
| Means for disposal of carcasses of animals that died in the farm |                                                          |                                                         |                                                         |          |
| Incineration / burial /<br>removal by specialised agent          | Given to dogs / left unburied /<br>left in water streams | Incineration / burial /<br>removal by specialised agent | Incineration / burial /<br>removal by specialised agent | <i>p</i> |
| 208                                                              | 176                                                      | 31                                                      | 29                                                      | 0.72     |
| Presence of a ditch at the entrance of the farm                  |                                                          |                                                         |                                                         |          |
| Yes                                                              | No                                                       | Yes                                                     | No                                                      | <i>p</i> |
| 0                                                                | 384                                                      | 0                                                       | 60                                                      | n/r      |
| Presence of a fence or a wall around the farm                    |                                                          |                                                         |                                                         |          |
| Yes                                                              | No                                                       | Yes                                                     | No                                                      | <i>p</i> |
| 201                                                              | 183                                                      | 21                                                      | 39                                                      | 0.012    |
| Carrying out disinfections in the farm                           |                                                          |                                                         |                                                         |          |
| Yes                                                              | No                                                       | Yes                                                     | No                                                      | <i>p</i> |
| 350                                                              | 34                                                       | 50                                                      | 10                                                      | 0.06     |
| Practicing sharing of equipment with other farms                 |                                                          |                                                         |                                                         |          |
| Yes                                                              | No                                                       | Yes                                                     | No                                                      | <i>p</i> |
| 16                                                               | 368                                                      | 2                                                       | 58                                                      | 0.76     |
| Administration of rodenticides                                   |                                                          |                                                         |                                                         |          |
| Yes                                                              | No                                                       | Yes                                                     | No                                                      | <i>p</i> |
| 149                                                              | 235                                                      | 28                                                      | 32                                                      | 0.25     |

|                                                                       |     |     |     |          |
|-----------------------------------------------------------------------|-----|-----|-----|----------|
| Presence of spots suitable for reproduction of vectors within 500 m   |     |     |     |          |
| Yes                                                                   | No  | Yes | No  | <i>p</i> |
| 227                                                                   | 157 | 30  | 30  | 0.18     |
| <b>Reproductive Management</b>                                        |     |     |     |          |
| Beginning of the mating period for ewes / does                        |     |     |     |          |
| May                                                                   |     | May |     | 0.89     |
| Application of reproductive control                                   |     |     |     |          |
| Yes                                                                   | No  | Yes | No  | <i>p</i> |
| 117                                                                   | 267 | 11  | 49  | 0.05     |
| Changes of rams / bucks into the ewes / does during the mating period |     |     |     |          |
| Yes                                                                   | No  | Yes | No  | <i>p</i> |
| 110                                                                   | 274 | 7   | 53  | 0.005    |
| Use of artificial insemination                                        |     |     |     |          |
| Yes                                                                   | No  | Yes | No  | <i>p</i> |
| 0                                                                     | 384 | 0   | 384 | n/r      |
| Use of embryo transfer                                                |     |     |     |          |
| Yes                                                                   | No  | Yes | No  | <i>p</i> |
| 0                                                                     | 384 | 0   | 384 | n/r      |
| Use of ultrasound for pregnancy diagnosis                             |     |     |     |          |
| Yes                                                                   | No  | Yes | No  | <i>p</i> |
| 130                                                                   | 254 | 9   | 51  | 0.003    |
| Nutritional modifications before the lambing / kidding period         |     |     |     |          |
| Yes                                                                   | No  | Yes | No  | <i>p</i> |
| 260                                                                   | 124 | 37  | 23  | 0.36     |

|                                                                  |     |          |    |          |
|------------------------------------------------------------------|-----|----------|----|----------|
| Grouping of pregnant females during the final stage of pregnancy |     |          |    |          |
| Yes                                                              | No  | Yes      | No | <i>p</i> |
| 253                                                              | 131 | 30       | 30 | 0.017    |
| Administration of oxytetracycline to the pregnant animals        |     |          |    |          |
| Yes                                                              | No  | Yes      | No | <i>p</i> |
| 193                                                              | 191 | 23       | 37 | 0.09     |
| Administration of selenium to pregnant animals                   |     |          |    |          |
| Yes                                                              | No  | Yes      | No | <i>p</i> |
| 122                                                              | 262 | 12       | 48 | 0.06     |
| Month of the start of the lambing / kidding season               |     |          |    |          |
| October                                                          |     | November |    | 0.023    |
| Induction of lambing / kidding                                   |     |          |    |          |
| Yes                                                              | No  | Yes      | No | <i>p</i> |
| 4                                                                | 380 | 2        | 58 | 0.15     |
| Recording of births – Maintenance of a lambing / kidding book    |     |          |    |          |
| Yes                                                              | No  | Yes      | No | <i>p</i> |
| 217                                                              | 167 | 31       | 29 | 0.48     |
| Newborn care and specific monitoring                             |     |          |    |          |
| Yes                                                              | No  | Yes      | No | <i>p</i> |
| 351                                                              | 33  | 51       | 9  | 0.11     |
| Administration of selenium to newborn animals                    |     |          |    |          |
| Yes                                                              | No  | Yes      | No | <i>p</i> |
| 266                                                              | 118 | 29       | 31 | 0.001    |
| Disinfection of navel stump in newborns                          |     |          |    |          |
| Yes                                                              | No  | Yes      | No | <i>p</i> |
| 245                                                              | 139 | 32       | 28 | 0.12     |



| Maintenance of a colostrum bank                           |                                |                            |                            |                                |                            |          |
|-----------------------------------------------------------|--------------------------------|----------------------------|----------------------------|--------------------------------|----------------------------|----------|
| Yes                                                       |                                | No                         |                            | Yes                            | No                         | <i>p</i> |
| 52                                                        |                                | 332                        |                            | 6                              | 54                         | 0.45     |
| Tail docking in newborns                                  |                                |                            |                            |                                |                            |          |
| Yes                                                       |                                | No                         |                            | Yes                            | No                         | <i>p</i> |
| 245                                                       |                                | 139                        |                            | 33                             | 27                         | 0.19     |
| Newborn fostering to female animals other than their dams |                                |                            |                            |                                |                            |          |
| Yes                                                       |                                | No                         |                            | Yes                            | No                         | <i>p</i> |
| 270                                                       |                                | 114                        |                            | 37                             | 23                         | 0.18     |
| Age of lamb / kid removal from their dams                 |                                |                            |                            |                                |                            |          |
| 50 (20) days                                              |                                |                            | 60 (15) days               |                                |                            | 0.12     |
| Management in the Milking Parlour                         |                                |                            |                            |                                |                            |          |
| Daily number of milking sessions                          |                                |                            |                            |                                |                            |          |
| One                                                       | Two                            | Three                      | One                        | Two                            | Three                      | <i>p</i> |
| 4                                                         | 318                            | 62                         | 1                          | 54                             | 5                          | 0.27     |
| System pulsation rate                                     |                                |                            |                            |                                |                            |          |
| < 140 p. min <sup>-1</sup>                                | 140 - 150 p. min <sup>-1</sup> | > 150 p. min <sup>-1</sup> | < 140 p. min <sup>-1</sup> | 140 - 150 p. min <sup>-1</sup> | > 150 p. min <sup>-1</sup> | <i>p</i> |
| 69                                                        | 168                            | 55                         | 9                          | 16                             | 4                          | 0.61     |
| System pressure                                           |                                |                            |                            |                                |                            |          |
| < 38 kPa                                                  | 38 - 42 kPa                    | > 42 kPa                   | < 38 kPa                   | 38 - 42 kPa                    | > 42 kPa                   | <i>p</i> |
| 25                                                        | 234                            | 33                         | 2                          | 24                             | 3                          | 0.94     |
| Use of teat disinfection after milking                    |                                |                            |                            |                                |                            |          |
| Yes                                                       |                                | No                         |                            | Yes                            | No                         | <i>p</i> |
| 63                                                        |                                | 321                        |                            | 1                              | 59                         | 0.003    |
| Temperature of cleaning water after the milking sessions  |                                |                            |                            |                                |                            |          |
| 70 (10) °C                                                |                                |                            | 70 (15) °C                 |                                |                            | 0.81     |

| Frequency of changing teatcups                                                                        |         |                               |               |                   |         |                               |               |                           |
|-------------------------------------------------------------------------------------------------------|---------|-------------------------------|---------------|-------------------|---------|-------------------------------|---------------|---------------------------|
| At least annually                                                                                     |         | Less frequently than annually |               | At least annually |         | Less frequently than annually |               | <i>p</i>                  |
| 147                                                                                                   |         | 145                           |               | 12                |         | 17                            |               | 0.36                      |
| Nutritional Management                                                                                |         |                               |               |                   |         |                               |               |                           |
| Provision of hay as fodder to animals                                                                 |         |                               |               |                   |         |                               |               |                           |
| Yes                                                                                                   |         | No                            |               | Yes               |         | No                            |               | <i>p</i>                  |
| 381                                                                                                   |         | 3                             |               | 59                |         | 1                             |               | 0.50                      |
| Average quantity of hay provided daily to animals during the preceding season                         |         |                               |               |                   |         |                               |               |                           |
| 0.97 (1.18) kg                                                                                        |         |                               |               | 0.61 (1.00) kg    |         |                               |               | 0.004                     |
| Provision of straw to animals                                                                         |         |                               |               |                   |         |                               |               |                           |
| Yes                                                                                                   |         | No                            |               | Yes               |         | No                            |               | <i>p</i>                  |
| 293                                                                                                   |         | 91                            |               | 38                |         | 22                            |               | 0.32                      |
| Provision of silage to adult animals                                                                  |         |                               |               |                   |         |                               |               |                           |
| Yes                                                                                                   |         | No                            |               | Yes               |         | No                            |               | <i>p</i>                  |
| 83                                                                                                    |         | 301                           |               | 7                 |         | 53                            |               | 0.07                      |
| Provision of finished feed (concentrate) to adult animals                                             |         |                               |               |                   |         |                               |               |                           |
| Yes                                                                                                   |         | No                            |               | Yes               |         | No                            |               | <i>p</i>                  |
| 379                                                                                                   |         | 5                             |               | 58                |         | 2                             |               | 0.24                      |
| Provision of finished feed (concentrate) to adult animals throughout the year                         |         |                               |               |                   |         |                               |               |                           |
| Yes                                                                                                   |         | No                            |               | Yes               |         | No                            |               | <i>p</i>                  |
| 121                                                                                                   |         | 258                           |               | 31                |         | 27                            |               | 0.001                     |
| Type of finished feed (concentrate) provided to adult animals                                         |         |                               |               |                   |         |                               |               |                           |
| Mash                                                                                                  | Pellets | Flakes                        | Small pellets | Mash              | Pellets | Flakes                        | Small pellets | <i>p</i>                  |
| 156                                                                                                   | 109     | 4                             | 121           | 19                | 30      | 0                             | 9             | 0.78, 0.0008, 0.43, 0.009 |
| Average quantity of finished feed (concentrate) provided daily to animals during the preceding season |         |                               |               |                   |         |                               |               |                           |
| 0.74 (0.62) kg                                                                                        |         |                               |               | 0.53 (0.48) kg    |         |                               |               | < 0.0001                  |

| Person responsible for nutritional management                                   |              |                     |                    |                      |              |                     |                    |                         |
|---------------------------------------------------------------------------------|--------------|---------------------|--------------------|----------------------|--------------|---------------------|--------------------|-------------------------|
| Farmer themselves                                                               | Veterinarian | Animal nutritionist | Other professional | Farmer themselves    | Veterinarian | Animal nutritionist | Other professional | <i>p</i>                |
| 247                                                                             | 117          | 15                  | 77                 | 45                   | 7            | 0                   | 11                 | 0.11, 0.003, 0.11, 0.76 |
| Production- or Health-related Outcomes                                          |              |                     |                    |                      |              |                     |                    |                         |
| Average milk production per ewe / doe during the preceding milking period       |              |                     |                    |                      |              |                     |                    |                         |
| 199.5 (127.5) L                                                                 |              |                     |                    | 129.0 (114) L        |              |                     |                    | < 0.0001                |
| Average number of lambs / kids born per ewe / doe                               |              |                     |                    |                      |              |                     |                    |                         |
| 1.28 (0.20) newborns                                                            |              |                     |                    | 1.20 (0.16) newborns |              |                     |                    | 0.003                   |
| Incidence of clinical mastitis during the preceding season                      |              |                     |                    |                      |              |                     |                    |                         |
| 2.0% (4.5%)                                                                     |              |                     |                    | 3.0% (4.1%)          |              |                     |                    | 0.021                   |
| Incidence of abortion during the preceding season                               |              |                     |                    |                      |              |                     |                    |                         |
| 0.0% (3.1%)                                                                     |              |                     |                    | 0.0% (2.4%)          |              |                     |                    | 0.99                    |
| Incidence of lameness during the preceding season                               |              |                     |                    |                      |              |                     |                    |                         |
| 0.0% (2.0%)                                                                     |              |                     |                    | 0.0% (1.3%)          |              |                     |                    | 0.21                    |
| Incidence of mange during the preceding season                                  |              |                     |                    |                      |              |                     |                    |                         |
| 0.0% (0.0%)                                                                     |              |                     |                    | 0.0% (0.0%)          |              |                     |                    | 0.60                    |
| Incidence of obstetrical problems during the preceding season                   |              |                     |                    |                      |              |                     |                    |                         |
| 0.0% (1.3%)                                                                     |              |                     |                    | 0.0% (1.2%)          |              |                     |                    | 0.71                    |
| Incidence of deaths, of any cause, in adult animals during the preceding season |              |                     |                    |                      |              |                     |                    |                         |
| 3.0% (3.9%)                                                                     |              |                     |                    | 3.0% (3.1%)          |              |                     |                    | 0.92                    |
| Incidence of pneumonia in lambs / kids during the preceding season              |              |                     |                    |                      |              |                     |                    |                         |
| 0.0% (4.8%)                                                                     |              |                     |                    | 0.0% (5.4%)          |              |                     |                    | 0.45                    |
| Incidence of diarrhoea in lambs / kids during the preceding season              |              |                     |                    |                      |              |                     |                    |                         |
| 2.0% (10.0%)                                                                    |              |                     |                    | 6.0% (16.7%)         |              |                     |                    | 0.08                    |
| Epg counts in faecal samples                                                    |              |                     |                    |                      |              |                     |                    |                         |
| 228 ± 11                                                                        |              |                     |                    | 320 ± 42             |              |                     |                    | 0.011                   |

|                                                                                                     |     |                                                                                                     |    |          |
|-----------------------------------------------------------------------------------------------------|-----|-----------------------------------------------------------------------------------------------------|----|----------|
| Body condition score                                                                                |     |                                                                                                     |    |          |
| 2.40 (0.22)                                                                                         |     | 2.26 (0.61)                                                                                         |    | 0.016    |
| Somatic cell counts in bulk-tank milk                                                               |     |                                                                                                     |    |          |
| 0.543 × 10 <sup>6</sup> (0.504 × 10 <sup>6</sup> - 0.583 × 10 <sup>6</sup> ) cells mL <sup>-1</sup> |     | 0.680 × 10 <sup>6</sup> (0.567 × 10 <sup>6</sup> - 0.814 × 10 <sup>6</sup> ) cells mL <sup>-1</sup> |    | 0.026    |
| Total bacterial counts in bulk-tank milk                                                            |     |                                                                                                     |    |          |
| 428 × 10 <sup>3</sup> (363 × 10 <sup>3</sup> - 501 × 10 <sup>3</sup> ) cfu mL <sup>-1</sup>         |     | 561 × 10 <sup>3</sup> (398 × 10 <sup>3</sup> - 776 × 10 <sup>3</sup> ) cfu mL <sup>-1</sup>         |    | 0.23     |
| Isolation of staphylococci from bulk-tank milk                                                      |     |                                                                                                     |    |          |
| Yes                                                                                                 | No  | Yes                                                                                                 | No | <i>p</i> |
| 246                                                                                                 | 138 | 33                                                                                                  | 27 | 0.18     |
| Isolation of antibiotic-resistant staphylococci from bulk-tank milk                                 |     |                                                                                                     |    |          |
| Yes                                                                                                 | No  | Yes                                                                                                 | No | <i>p</i> |
| 120                                                                                                 | 264 | 15                                                                                                  | 45 | 0.33     |
| Isolation of <i>Listeria</i> spp. from bulk-tank milk                                               |     |                                                                                                     |    |          |
| Yes                                                                                                 | No  | Yes                                                                                                 | No | <i>p</i> |
| 4                                                                                                   | 380 | 0                                                                                                   | 60 | 0.42     |
| Fat content in bulk-tank milk                                                                       |     |                                                                                                     |    |          |
| 5.83% ± 0.06%                                                                                       |     | 5.60% ± 0.16%                                                                                       |    | 0.15     |
| Protein content in bulk-tank milk                                                                   |     |                                                                                                     |    |          |
| 4.12% ± 0.03%                                                                                       |     | 4.02% ± 0.08%                                                                                       |    | 0.24     |
| Added water in bulk-tank milk                                                                       |     |                                                                                                     |    |          |
| 0.57% ± 0.10%                                                                                       |     | 1.01% ± 0.40%                                                                                       |    | 0.14     |
| Characteristics of Human Resources                                                                  |     |                                                                                                     |    |          |
| Age of the farmer                                                                                   |     |                                                                                                     |    |          |
| 46 (17)                                                                                             |     | 50 (21)                                                                                             |    | 0.53     |
| Length of previous animal farming experience                                                        |     |                                                                                                     |    |          |
| 25 (25)                                                                                             |     | 30 (10)                                                                                             |    | 0.019    |

| Farmer's general education                   |                                |           |           |                                |          |
|----------------------------------------------|--------------------------------|-----------|-----------|--------------------------------|----------|
| Primary                                      | Secondary or<br>post-secondary | Tertiary  | Primary   | Secondary or<br>post-secondary | Tertiary |
| 24                                           | 266                            | 46        | 6         | 48                             | 6        |
| <i>p</i>                                     |                                |           |           |                                |          |
|                                              |                                |           |           |                                | 0.58     |
| Farmer's professional involvement in farming |                                |           |           |                                |          |
| Full-time                                    |                                | Part-time | Full-time | Part-time                      | <i>p</i> |
| 342                                          |                                | 42        | 55        | 5                              | 0.54     |
| Daily period spent by farmer at the farm     |                                |           |           |                                |          |
|                                              | 15 (7) hours                   |           |           | 10 (7) hours                   | 0.035    |
| Family tradition in farming                  |                                |           |           |                                |          |
| Yes                                          |                                | No        | Yes       | No                             | <i>p</i> |
| 332                                          |                                | 52        | 54        | 6                              | 0.45     |
| Presence of working staff in the farm        |                                |           |           |                                |          |
| Yes                                          |                                | No        | Yes       | No                             | <i>p</i> |
| 138                                          |                                | 246       | 19        | 41                             | 0.52     |
| Occurrence of brucellosis in farmer          |                                |           |           |                                |          |
| Yes                                          |                                | No        | Yes       | No                             | <i>p</i> |
| 47                                           |                                | 316       | 10        | 34                             | 0.08     |

**Table S3.** Results of univariable analysis of parameters related to management practices and to production- or health-related outcomes ( $n = 39$ ) evaluated for association, in 283 sheep flocks and 101 goat herds in Greece, with a ‘professional relationship with a veterinarian’, in accord with the gender of the veterinarian.

| Farms in which there was a professional relationship<br>with a female veterinarian ( <i>n</i> = 121) |                        |                      |                  | Farms in which there was a professional relationship<br>with a male veterinarian ( <i>n</i> = 263) |                  |                        |                 |                            |        |                                         |
|------------------------------------------------------------------------------------------------------|------------------------|----------------------|------------------|----------------------------------------------------------------------------------------------------|------------------|------------------------|-----------------|----------------------------|--------|-----------------------------------------|
| Health Management                                                                                    |                        |                      |                  |                                                                                                    |                  |                        |                 |                            |        |                                         |
| Use of laboratory diagnostic examinations in samples of milk preventively                            |                        |                      |                  |                                                                                                    |                  |                        |                 |                            |        |                                         |
| Yes                                                                                                  | No                     |                      |                  | Yes                                                                                                | No               |                        |                 | <i>p</i>                   |        |                                         |
| 38                                                                                                   | 83                     |                      |                  | 53                                                                                                 | 210              |                        |                 | 0.016                      |        |                                         |
| Use of laboratory diagnostic examinations in samples of faeces preventively                          |                        |                      |                  |                                                                                                    |                  |                        |                 |                            |        |                                         |
| Yes                                                                                                  | No                     |                      |                  | Yes                                                                                                | No               |                        |                 | <i>p</i>                   |        |                                         |
| 21                                                                                                   | 100                    |                      |                  | 30                                                                                                 | 233              |                        |                 | 0.11                       |        |                                         |
| Number of occasions of administration of anthelmintic drugs annually                                 |                        |                      |                  |                                                                                                    |                  |                        |                 |                            |        |                                         |
| 2 (1)                                                                                                |                        |                      |                  | 2 (1)                                                                                              |                  |                        |                 | 0.36                       |        |                                         |
| Families of anthelmintics administered                                                               |                        |                      |                  |                                                                                                    |                  |                        |                 |                            |        |                                         |
| Benzimidazoles                                                                                       | Imidazothiazoles       | Macrocyclic lactones | Salicylanilides  | Benzimidazoles                                                                                     | Imidazothiazoles | Macrocyclic lactones   | Salicylanilides | <i>p</i>                   |        |                                         |
| 89                                                                                                   | 1                      | 100                  | 15               | 189                                                                                                | 8                | 181                    | 16              | 0.78, 0.14,<br>0.005, 0.35 |        |                                         |
| Pharmaceutical form of anthelmintics administered                                                    |                        |                      |                  |                                                                                                    |                  |                        |                 |                            |        |                                         |
| Tablet                                                                                               | Injectable<br>solution | Oral drench          | Pour-on solution | Premix                                                                                             | Tablet           | Injectable<br>solution | Oral drench     | Pour-on solution           | Premix | <i>p</i>                                |
| 82                                                                                                   | 88                     | 77                   | 4                | 0                                                                                                  | 182              | 145                    | 94              | 15                         | 2      | 0.78, 0.001,<br>< 0.0002,<br>0.13, 0.28 |
| Vaccination against <i>Chlamydia</i> infection                                                       |                        |                      |                  |                                                                                                    |                  |                        |                 |                            |        |                                         |
| Yes                                                                                                  | No                     |                      |                  | Yes                                                                                                | No               |                        |                 | <i>p</i>                   |        |                                         |
| 46                                                                                                   | 85                     |                      |                  | 107                                                                                                | 156              |                        |                 | 0.29                       |        |                                         |

| Vaccination against contagious agalactia                                               |            |          |            |          |
|----------------------------------------------------------------------------------------|------------|----------|------------|----------|
| Yes                                                                                    | No         | Yes      | No         | <i>p</i> |
| 74                                                                                     | 47         | 161      | 101        | 0.99     |
| Vaccination against staphylococcal mastitis                                            |            |          |            |          |
| Yes                                                                                    | No         | Yes      | No         | <i>p</i> |
| 49                                                                                     | 72         | 101      | 162        | 0.70     |
| Total number of optional vaccines administered annually                                |            |          |            |          |
| 3 (2)                                                                                  |            | 3 (2)    |            | 0.99     |
| Record keeping                                                                         |            |          |            |          |
| Yes                                                                                    | No         | Yes      | No         | <i>p</i> |
| 82                                                                                     | 39         | 174      | 89         | 0.76     |
| Pharmaceutical Treatment                                                               |            |          |            |          |
| Routine administration of antimicrobials to newborns                                   |            |          |            |          |
| Yes                                                                                    | No         | Yes      | No         | <i>p</i> |
| 24                                                                                     | 97         | 70       | 193        | 0.15     |
| Means of calculating live bodyweight for the administration of pharmaceutical products |            |          |            |          |
| Weighing                                                                               | Estimation | Weighing | Estimation | <i>p</i> |
| 31                                                                                     | 90         | 46       | 215        | 0.07     |
| Administration of flunixin in cases of clinical mastitis                               |            |          |            |          |
| Yes                                                                                    | No         | Yes      | No         | <i>p</i> |
| 18                                                                                     | 103        | 20       | 241        | 0.028    |
| Biosecurity Management                                                                 |            |          |            |          |
| Quarantine of new animals arriving at the farm                                         |            |          |            |          |
| Yes                                                                                    | No         | Yes      | No         | <i>p</i> |
| 75                                                                                     | 46         | 170      | 93         | 0.61     |

|                                                                       |    |     |     |          |
|-----------------------------------------------------------------------|----|-----|-----|----------|
| Isolation of sick animals at the farm                                 |    |     |     |          |
| Yes                                                                   | No | Yes | No  | <i>p</i> |
| 102                                                                   | 19 | 226 | 37  | 0.67     |
| Presence of a fence or a wall around the farm                         |    |     |     |          |
| Yes                                                                   | No | Yes | No  | <i>p</i> |
| 49                                                                    | 72 | 152 | 111 | 0.002    |
| Carrying out disinfections in the farm                                |    |     |     |          |
| Yes                                                                   | No | Yes | No  | <i>p</i> |
| 118                                                                   | 3  | 232 | 31  | 0.003    |
| Reproductive Management                                               |    |     |     |          |
| Application of reproductive control                                   |    |     |     |          |
| Yes                                                                   | No | Yes | No  | <i>p</i> |
| 52                                                                    | 69 | 65  | 198 | 0.0003   |
| Changes of rams / bucks into the ewes / does during the mating period |    |     |     |          |
| Yes                                                                   | No | Yes | No  | <i>p</i> |
| 35                                                                    | 86 | 75  | 188 | 0.93     |
| Use of ultrasound for pregnancy diagnosis                             |    |     |     |          |
| Yes                                                                   | No | Yes | No  | <i>p</i> |
| 49                                                                    | 72 | 81  | 182 | 0.06     |
| Grouping of pregnant females during the final stage of pregnancy      |    |     |     |          |
| Yes                                                                   | No | Yes | No  | <i>p</i> |
| 95                                                                    | 36 | 158 | 105 | 0.015    |
| Administration of oxytetracycline to the pregnant animals             |    |     |     |          |
| Yes                                                                   | No | Yes | No  | <i>p</i> |
| 73                                                                    | 48 | 120 | 143 | 0.007    |



|                                                                                                       |         |        |               |                |         |        |               |                        |
|-------------------------------------------------------------------------------------------------------|---------|--------|---------------|----------------|---------|--------|---------------|------------------------|
| Administration of selenium to pregnant animals                                                        |         |        |               |                |         |        |               |                        |
| Yes                                                                                                   |         | No     |               | Yes            |         | No     |               | <i>p</i>               |
| 35                                                                                                    |         | 86     |               | 89             |         | 176    |               | 0.36                   |
| Month of the start of the lambing / kidding season                                                    |         |        |               |                |         |        |               |                        |
| October                                                                                               |         |        |               | October        |         |        |               | 0.11                   |
| Administration of selenium to newborn animals                                                         |         |        |               |                |         |        |               |                        |
| Yes                                                                                                   |         | No     |               | Yes            |         | No     |               | <i>p</i>               |
| 94                                                                                                    |         | 27     |               | 172            |         | 101    |               | 0.004                  |
| Management in the Milking Parlour                                                                     |         |        |               |                |         |        |               |                        |
| Use of teat disinfection after milking                                                                |         |        |               |                |         |        |               |                        |
| Yes                                                                                                   |         | No     |               | Yes            |         | No     |               | <i>p</i>               |
| 19                                                                                                    |         | 102    |               | 44             |         | 219    |               | 0.80                   |
| Nutritional Management                                                                                |         |        |               |                |         |        |               |                        |
| Average quantity of hay provided daily to animals during the preceding season                         |         |        |               |                |         |        |               |                        |
| 0.83 (1.22) kg                                                                                        |         |        |               | 1.04 (1.18) kg |         |        |               | 0.59                   |
| Provision of silage to adult animals                                                                  |         |        |               |                |         |        |               |                        |
| Yes                                                                                                   |         | No     |               | Yes            |         | No     |               | <i>p</i>               |
| 26                                                                                                    |         | 95     |               | 57             |         | 206    |               | 0.97                   |
| Provision of finished feed (concentrate) to adult animals throughout the year                         |         |        |               |                |         |        |               |                        |
| Yes                                                                                                   |         | No     |               | Yes            |         | No     |               | <i>p</i>               |
| 78                                                                                                    |         | 43     |               | 180            |         | 83     |               | 0.44                   |
| Type of finished feed (concentrate) provided to adult animals                                         |         |        |               |                |         |        |               |                        |
| Mash                                                                                                  | Pellets | Flakes | Small pellets | Mash           | Pellets | Flakes | Small pellets | <i>p</i>               |
| 52                                                                                                    | 40      | 0      | 31            | 104            | 69      | 4      | 90            | 0.52, 0.17, 0.22, 0.09 |
| Average quantity of finished feed (concentrate) provided daily to animals during the preceding season |         |        |               |                |         |        |               |                        |
| 0.74 (0.54) kg                                                                                        |         |        |               | 0.72 (0.62) kg |         |        |               | 0.73                   |

| Person responsible for nutritional management                                                       |              |                     |                    |                                                                                                     |              |                     |                    |                        |
|-----------------------------------------------------------------------------------------------------|--------------|---------------------|--------------------|-----------------------------------------------------------------------------------------------------|--------------|---------------------|--------------------|------------------------|
| Farmer themselves                                                                                   | Veterinarian | Animal nutritionist | Other professional | Farmer themselves                                                                                   | Veterinarian | Animal nutritionist | Other professional | <i>p</i>               |
| 76                                                                                                  | 40           | 6                   | 26                 | 171                                                                                                 | 77           | 9                   | 51                 | 0.67, 0.45, 0.47, 0.63 |
| Production- or Health-related Outcomes                                                              |              |                     |                    |                                                                                                     |              |                     |                    |                        |
| Average milk production per ewe / doe during the preceding milking period                           |              |                     |                    |                                                                                                     |              |                     |                    |                        |
| 190.0 (112.5) L                                                                                     |              |                     |                    | 200.0 (131) L                                                                                       |              |                     |                    | 0.43                   |
| Average number of lambs / kids born per ewe / doe                                                   |              |                     |                    |                                                                                                     |              |                     |                    |                        |
| 1.25 (0.24) newborns                                                                                |              |                     |                    | 1.29 (0.22) newborns                                                                                |              |                     |                    | 0.40                   |
| Incidence of clinical mastitis during the preceding season                                          |              |                     |                    |                                                                                                     |              |                     |                    |                        |
| 1.7% (4.8%)                                                                                         |              |                     |                    | 2.4% (4.6%)                                                                                         |              |                     |                    | 0.16                   |
| Incidence of diarrhoea in lambs / kids during the preceding season                                  |              |                     |                    |                                                                                                     |              |                     |                    |                        |
| 1.4% (9.3%)                                                                                         |              |                     |                    | 2.5% (10.1%)                                                                                        |              |                     |                    | 0.44                   |
| Epg counts in faecal samples                                                                        |              |                     |                    |                                                                                                     |              |                     |                    |                        |
| 183 ± 15                                                                                            |              |                     |                    | 250 ± 16                                                                                            |              |                     |                    | 0.024                  |
| Body condition score                                                                                |              |                     |                    |                                                                                                     |              |                     |                    |                        |
| 2.36 (0.56)                                                                                         |              |                     |                    | 2.42 (0.46)                                                                                         |              |                     |                    | 0.55                   |
| Somatic cell counts in bulk-tank milk                                                               |              |                     |                    |                                                                                                     |              |                     |                    |                        |
| 0.461 × 10 <sup>6</sup> (0.401 × 10 <sup>6</sup> - 0.529 × 10 <sup>6</sup> ) cells mL <sup>-1</sup> |              |                     |                    | 0.585 × 10 <sup>6</sup> (0.540 × 10 <sup>6</sup> - 0.638 × 10 <sup>6</sup> ) cells mL <sup>-1</sup> |              |                     |                    | 0.026                  |

**Table S4.** Results of univariable analysis of parameters related to management practices and to production- or health-related outcomes ( $n = 39$ ) evaluated for association, in 283 sheep flocks and 101 goat herds in Greece with a ‘professional relationship with a veterinarian’, in accord with the age of the veterinarian.

| Farms in which there was a professional relationship with a veterinarian ( $n = 384$ ) |                                  |          |
|----------------------------------------------------------------------------------------|----------------------------------|----------|
| Health Management                                                                      |                                  |          |
|                                                                                        | $r_{sp}$                         | $p$      |
| Use of laboratory diagnostic examinations in samples of milk preventively              | −0.036                           | 0.48     |
| Use of laboratory diagnostic examinations in samples of faeces preventively            | −0.063                           | 0.34     |
| Number of occasions of administration of anthelmintic drugs annually                   | 0.071                            | 0.17     |
| Families of anthelmintics administered                                                 | $0.010 <  \text{value}  < 0.091$ | $> 0.07$ |
| Pharmaceutical form of anthelmintics administered                                      | $0.052 <  \text{value}  < 0.076$ | $> 0.13$ |
| Vaccination against <i>Chlamydia</i> infection                                         | 0.006                            | 0.91     |
| Vaccination against contagious agalactia                                               | 0.111                            | 0.029    |
| Vaccination against staphylococcal mastitis                                            | 0.039                            | 0.45     |
| Total number of optional vaccines administered annually                                | −0.095                           | 0.06     |
| Record keeping                                                                         | −0.044                           | 0.39     |
| Pharmaceutical Treatment                                                               |                                  |          |
|                                                                                        | $r_{sp}$                         | $p$      |
| Routine administration of antimicrobials to newborns                                   | 0.015                            | 0.77     |
| Means of calculating live bodyweight for the administration of pharmaceutical products | 0.096                            | 0.06     |
| Administration of flunixin in cases of clinical mastitis                               | 0.143                            | 0.005    |
| Biosecurity Management                                                                 |                                  |          |
|                                                                                        | $r_{sp}$                         | $p$      |
| Quarantine of new animals arriving at the farm                                         | −0.057                           | 0.27     |
| Isolation of sick animals at the farm                                                  | −0.090                           | 0.08     |
| Presence of a fence or a wall around the farm                                          | −0.158                           | 0.002    |

|                                                                                                       |                       |          |
|-------------------------------------------------------------------------------------------------------|-----------------------|----------|
| Carrying out disinfections in the farm                                                                | −0.072                | 0.16     |
| <b>Reproductive Management</b>                                                                        |                       |          |
|                                                                                                       | <i>r<sub>sp</sub></i> | <i>p</i> |
| Application of reproductive control                                                                   | 0.074                 | 0.15     |
| Changes of rams / bucks into the ewes / does during the mating period                                 | −0.022                | 0.66     |
| Use of ultrasound for pregnancy diagnosis                                                             | 0.054                 | 0.29     |
| Grouping of pregnant females during the final stage of pregnancy                                      | −0.026                | 0.61     |
| Administration of oxytetracycline to the pregnant animals                                             | 0.014                 | 0.78     |
| Administration of selenium to pregnant animals                                                        | 0.185                 | 0.0002   |
| Month of the start of the lambing / kidding season                                                    | 0.010                 | 0.05     |
| Administration of selenium to newborn animals                                                         | 0.097                 | 0.06     |
| <b>Management in the Milking Parlour</b>                                                              |                       |          |
|                                                                                                       | <i>r<sub>sp</sub></i> | <i>p</i> |
| Use of teat disinfection after milking                                                                | 0.092                 | 0.08     |
| <b>Nutritional Management</b>                                                                         |                       |          |
|                                                                                                       | <i>r<sub>sp</sub></i> | <i>p</i> |
| Average quantity of hay provided daily to animals during the preceding season                         | −0.138                | 0.007    |
| Provision of silage to adult animals                                                                  | 0.036                 | 0.48     |
| Provision of finished feed (concentrate) to adult animals throughout the year                         | 0.012                 | 0.82     |
| Type of finished feed (concentrate) provided to adult animals                                         | 0.056                 | 0.27     |
| Average quantity of finished feed (concentrate) provided daily to animals during the preceding season | −0.115                | 0.025    |
| Person responsible for nutritional management                                                         | 0.039 < value < 0.074 | > 0.15   |
| <b>Production- or Health-related Outcomes</b>                                                         |                       |          |
|                                                                                                       | <i>r<sub>sp</sub></i> | <i>p</i> |
| Average milk production per ewe / doe during the preceding milking period                             | −0.039                | 0.44     |
| Average number of lambs / kids born per ewe / doe                                                     | 0.022                 | 0.66     |

|                                                                    |        |       |
|--------------------------------------------------------------------|--------|-------|
| Incidence of clinical mastitis during the preceding season         | 0.116  | 0.024 |
| Incidence of diarrhoea in lambs / kids during the preceding season | 0.013  | 0.79  |
| Epg counts in faecal samples                                       | 0.131  | 0.020 |
| Body condition score                                               | 0.070  | 0.17  |
| Somatic cell counts in bulk-tank milk                              | −0.098 | 0.06  |

---

**Table S5.** Results of univariable analysis of parameters related to management practices and to production- or health-related outcomes ( $n = 39$ ) evaluated for association, in 283 sheep flocks and 101 goat herds in Greece with a ‘professional relationship with a veterinarian’, in accord with the annual frequency of veterinary visits to the farm.

| Farms in which there was a professional relationship with a veterinarian ( $n = 384$ ) |                       |          |
|----------------------------------------------------------------------------------------|-----------------------|----------|
| Health Management                                                                      |                       |          |
|                                                                                        | $r_{sp}$              | $p$      |
| Use of laboratory diagnostic examinations in samples of milk preventively              | −0.179                | 0.004    |
| Use of laboratory diagnostic examinations in samples of faeces preventively            | −0.238                | < 0.0001 |
| Number of occasions of administration of anthelmintic drugs annually                   | 0.105                 | 0.041    |
| Families of anthelmintics administered                                                 | 0.023 < value < 0.082 | > 0.11   |
| Pharmaceutical form of anthelmintics administered                                      |                       |          |
| Tablet                                                                                 | −0.021                | 0.68     |
| Injectable solution                                                                    | −0.110                | 0.032    |
| Oral drench                                                                            | −0.096                | 0.06     |
| Pour-on                                                                                | −0.054                | 0.29     |
| Premix                                                                                 | 0.007                 | 0.89     |
| Vaccination against <i>Chlamydia</i> infection                                         | −0.091                | 0.08     |
| Vaccination against contagious agalactia                                               | −0.143                | 0.005    |
| Vaccination against staphylococcal mastitis                                            | 0.002                 | 0.96     |
| Total number of optional vaccines administered annually                                | 0.025                 | 0.63     |
| Record keeping                                                                         | 0.066                 | 0.20     |
| Pharmaceutical Treatment                                                               |                       |          |
|                                                                                        | $r_{sp}$              | $p$      |
| Routine administration of antimicrobials to newborns                                   | −0.105                | 0.040    |
| Means of calculating live bodyweight for the administration of pharmaceutical products | −0.125                | 0.014    |
| Administration of flunixin in cases of clinical mastitis                               | 0.082                 | 0.11     |

| Biosecurity Management                                                                                |          |          |
|-------------------------------------------------------------------------------------------------------|----------|----------|
|                                                                                                       | $r_{sp}$ | $p$      |
| Quarantine of new animals arriving at the farm                                                        | −0.051   | 0.32     |
| Isolation of sick animals at the farm                                                                 | −0.042   | 0.41     |
| Presence of a fence or a wall around the farm                                                         | −0.069   | 0.17     |
| Carrying out disinfections in the farm                                                                | 0.102    | 0.045    |
| Reproductive Management                                                                               |          |          |
|                                                                                                       | $r_{sp}$ | $p$      |
| Application of reproductive control                                                                   | −0.083   | 0.10     |
| Changes of rams / bucks into the ewes / does during the mating period                                 | −0.161   | 0.002    |
| Use of ultrasound for pregnancy diagnosis                                                             | −0.206   | < 0.0001 |
| Grouping of pregnant females during the final stage of pregnancy                                      | 0.076    | 0.14     |
| Administration of oxytetracycline to the pregnant animals                                             | 0.025    | 0.63     |
| Administration of selenium to pregnant animals                                                        | 0.106    | 0.037    |
| Month of the start of the lambing / kidding season                                                    | −0.078   | 0.13     |
| Administration of selenium to newborn animals                                                         | −0.113   | 0.027    |
| Management in the Milking Parlour                                                                     |          |          |
|                                                                                                       | $r_{sp}$ | $p$      |
| Use of teat disinfection after milking                                                                | −0.058   | 0.25     |
| Nutritional Management                                                                                |          |          |
|                                                                                                       | $r_{sp}$ | $p$      |
| Average quantity of hay provided daily to animals during the preceding season                         | 0.078    | 0.13     |
| Provision of silage to adult animals                                                                  | −0.252   | < 0.0001 |
| Provision of finished feed (concentrate) to adult animals throughout the year                         | −0.182   | 0.0004   |
| Type of finished feed (concentrate) provided to adult animals                                         | −0.111   | 0.030    |
| Average quantity of finished feed (concentrate) provided daily to animals during the preceding season | −0.013   | 0.80     |

|                                                                           |                       |          |
|---------------------------------------------------------------------------|-----------------------|----------|
| Person responsible for nutritional management                             |                       |          |
| Farmer themselves                                                         | 0.210                 | 0.0001   |
| Veterinarian                                                              | −0.131                | 0.010    |
| Animal nutritionist                                                       | −0.049                | 0.34     |
| Other professional                                                        | 0.011                 | 0.82     |
| <b>Production- or Health-related Outcomes</b>                             |                       |          |
|                                                                           | <i>r<sub>sp</sub></i> | <i>p</i> |
| Average milk production per ewe / doe during the preceding milking period | −0.001                | 0.98     |
| Average number of lambs / kids born per ewe / doe                         | 0.091                 | 0.08     |
| Incidence of clinical mastitis during the preceding season                | −0.069                | 0.18     |
| Incidence of diarrhoea in lambs / kids during the preceding season        | 0.037                 | 0.47     |
| Epg counts in faecal samples                                              | 0.041                 | 0.46     |
| Body condition score                                                      | 0.001                 | 0.98     |
| Somatic cell counts in bulk-tank milk                                     | 0.003                 | 0.94     |
